# Supplementary material
Source: ML conference proceedings conference paper supplement (https://proceedings.neurips.cc/paper_files/paper/2019/hash/eb86d510361fc23b59f18c1bc9802cc6-Abstract.html)
Supplement: Supplementary file [file eb86d510361fc23b59f18c1bc9802cc6-Supplemental.zip]

## A Brownian Motion Simulation

In this section, we introduce how  $W_1$ ,  $W_2$  and  $W_3$  can be sampled. Let  $\{B_t\}_{t \in [0, h]}$  be the standard  $d$ -dimensional Brownian motion on  $t \in [0, h]$ . In Algorithm 1,  $W_1 = \int_0^{\alpha h} (1 - e^{-2(\alpha h - s)}) dB_s$ ,  $W_2 = \int_0^h (1 - e^{-2(h-s)}) dB_s$  and  $W_3 = \int_0^h e^{-2(h-s)} dB_s$ . We define  $G_1 = \int_0^{\alpha h} e^{2s} dB_s$ ,  $G_2 = \int_{\alpha h}^h e^{2s} dB_s$ ,  $H_1 = \int_0^{\alpha h} dB_s$  and  $H_2 = \int_{\alpha h}^h dB_s$ . Then,  $W_1 = H_1 - e^{-2\alpha h} G_1$ ,  $W_2 = (H_1 + H_2) - e^{-2h} (G_1 + G_2)$  and  $W_3 = e^{-2h} (G_1 + G_2)$ . It is sufficient to sample  $H_1$ ,  $H_2$ ,  $G_1$  and  $G_2$ . We can show that  $(G_1, H_1)$  is independent of  $(G_2, H_2)$ , and  $(G_1, H_1)$  and  $(G_2, H_2)$  both follow a  $2d$ -dimensional Gaussian distribution, which can be easily sampled.

**Lemma 5.** Define  $G_1 = \int_0^{\alpha h} e^{2s} dB_s$ ,  $G_2 = \int_{\alpha h}^h e^{2s} dB_s$ ,  $H_1 = \int_0^{\alpha h} dB_s$  and  $H_2 = \int_{\alpha h}^h dB_s$ . Then,  $(G_1, H_1)$  is independent of  $(G_2, H_2)$ . Moreover,  $(G_1, H_1)$  and  $(G_2, H_2)$  both follow a  $2d$ -dimensional Gaussian distribution with mean zero. Conditional on the choice of  $\alpha$ , their covariance is given by

$$\begin{aligned} \mathbb{E} \left[ (G_1 - \mathbb{E}G_1) (H_1 - \mathbb{E}H_1)^T \right] &= \frac{1}{2} (e^{2\alpha h} - 1) \cdot I_d, \\ \mathbb{E} \left[ (G_1 - \mathbb{E}G_1) (G_1 - \mathbb{E}G_1)^T \right] &= \frac{1}{4} (e^{4\alpha h} - 1) \cdot I_d, \\ \mathbb{E} \left[ (H_1 - \mathbb{E}H_1) (H_1 - \mathbb{E}H_1)^T \right] &= \alpha h \cdot I_d, \\ \mathbb{E} \left[ (G_2 - \mathbb{E}G_2) (H_2 - \mathbb{E}H_2)^T \right] &= \frac{1}{2} (e^{2h} - e^{2\alpha h}) \cdot I_d, \\ \mathbb{E} \left[ (G_2 - \mathbb{E}G_2) (G_2 - \mathbb{E}G_2)^T \right] &= \frac{1}{4} (e^{4h} - e^{4\alpha h}) \cdot I_d, \\ \mathbb{E} \left[ (H_2 - \mathbb{E}H_2) (H_2 - \mathbb{E}H_2)^T \right] &= (h - \alpha h) \cdot I_d. \end{aligned}$$

*Proof.* By the definition of the standard Brownian motion,  $(G_1, H_1)$  is independent of  $(G_2, H_2)$  and  $(G_1, H_1)$  and  $(G_2, H_2)$  both have mean zero. Moreover,

$$\begin{aligned} \mathbb{E} \left[ (G_1 - \mathbb{E}G_1) (H_1 - \mathbb{E}H_1)^T \right] &= \mathbb{E} \left[ \left( \int_0^{\alpha h} e^{2s} dB_s \right) \left( \int_0^{\alpha h} dB_s \right)^T \right] = \int_0^{\alpha h} e^{2s} ds \cdot I_d \\ &= \frac{1}{2} (e^{2\alpha h} - 1) \cdot I_d, \end{aligned}$$

$$\begin{aligned} \mathbb{E} \left[ (G_1 - \mathbb{E}G_1) (G_1 - \mathbb{E}G_1)^T \right] &= \mathbb{E} \left[ \left( \int_0^{\alpha h} e^{2s} dB_s \right) \left( \int_0^{\alpha h} e^{2s} dB_s \right)^T \right] = \int_0^{\alpha h} e^{4s} ds \cdot I_d \\ &= \frac{1}{4} (e^{4\alpha h} - 1) \cdot I_d, \end{aligned}$$

and

$$\mathbb{E} \left[ (H_1 - \mathbb{E}H_1) (H_1 - \mathbb{E}H_1)^T \right] = \alpha h \cdot I_d.$$

Similarly,

$$\begin{aligned} \mathbb{E} \left[ (G_2 - \mathbb{E}G_2) (H_2 - \mathbb{E}H_2)^T \right] &= \mathbb{E} \left[ \left( \int_{\alpha h}^h e^{2s} dB_s \right) \left( \int_{\alpha h}^h dB_s \right)^T \right] = \int_{\alpha h}^h e^{2s} ds \cdot I_d \\ &= \frac{1}{2} (e^{2h} - e^{2\alpha h}) \cdot I_d, \end{aligned}$$

$$\mathbb{E} \left[ (G_1 - \mathbb{E}G_1) (G_1 - \mathbb{E}G_1)^T \right] = \mathbb{E} \left[ \left( \int_{\alpha h}^h e^{2s} dB_s \right) \left( \int_{\alpha h}^h e^{2s} dB_s \right)^T \right] = \int_{\alpha h}^h e^{4s} ds \cdot I_d$$

$$= \frac{1}{4} (e^{4h} - e^{4\alpha h}) \cdot I_d,$$

and

$$\mathbb{E} \left[ (H_2 - \mathbb{E}H_2) (H_2 - \mathbb{E}H_2)^T \right] = (h - \alpha h) \cdot I_d.$$

□

## B Properties of the ULD and the Brownian motion

Here, we prove some properties of the ULD and the Brownian motion. These properties are used in Appendices C, D, E and F to prove the guarantee of our algorithm.

### B.1 Properties of the ULD

**Lemma 6.** *Let  $\{x(t)\}_{t \in [0, h]}$  and  $\{v(t)\}_{t \in [0, h]}$  be the solution to the underdamped Langevin diffusion (3) on  $t \in [0, h]$ . Assume that  $h \leq \frac{1}{20}$  and  $u = \frac{1}{L}$ . We have the following bounds.*

$$\begin{aligned} \mathbb{E} \sup_{t \in [0, h]} \|v(t)\|^2 &\leq O \left( \|v(0)\|^2 + u^2 h^2 \|\nabla f(x(0))\|^2 + u d h \right), \\ \mathbb{E} \sup_{t \in [0, h]} \|\nabla f(x(t))\|^2 &\leq O \left( \|\nabla f(x(0))\|^2 + L^2 h^2 \|v(0)\|^2 + L d h^3 \right), \\ \mathbb{E} \sup_{t \in [0, h]} \|x(0) - x(t)\|^2 &\leq O \left( h^2 \|v(0)\|^2 + u^2 h^4 \|\nabla f(x(0))\|^2 + u d h^3 \right), \end{aligned}$$

and

$$\begin{aligned} -\mathbb{E} \inf_{t \in [0, h]} \|v(t)\|^2 &\leq -\frac{1}{3} \|v(0)\|^2 + O \left( u^2 h^2 \|\nabla f(x(0))\|^2 + u d h \right), \\ -\mathbb{E} \inf_{t \in [0, h]} \|\nabla f(x(t))\|^2 &\leq -\frac{1}{3} \|\nabla f(x(0))\|^2 + O \left( h^2 L^2 \|v(0)\|^2 + L d h^3 \right). \end{aligned}$$

*Proof.* We first show the first three bounds. We can write  $\mathbb{E} \sup_{t \in [0, h]} \|\nabla f(x(t))\|^2$  as

$$\begin{aligned} &\mathbb{E} \sup_{t \in [0, h]} \|\nabla f(x(t))\|^2 \\ &\leq 2 \|\nabla f(x(0))\|^2 + 2 \mathbb{E} \sup_{t \in [0, h]} \|\nabla f(x(0)) - \nabla f(x(t))\|^2 \\ &\leq 2 \|\nabla f(x(0))\|^2 + 2 L^2 \mathbb{E} \sup_{t \in [0, h]} \|x(0) - x(t)\|^2, \end{aligned} \tag{6}$$

where the first step follows by Young's inequality and the second step follows by  $\nabla f$  is  $L$ -Lipschitz. To bound  $\mathbb{E} \sup_{t \in [0, h]} \|x(0) - x(t)\|^2$ ,

$$\begin{aligned} \mathbb{E} \sup_{t \in [0, h]} \|x(0) - x(t)\|^2 &= \mathbb{E} \sup_{t \in [0, h]} \left\| \int_0^t v(s) \, ds \right\|^2 \\ &\leq \mathbb{E} \sup_{t \in [0, h]} t \int_0^t \|v(s)\|^2 \, ds \\ &\leq h^2 \mathbb{E} \sup_{t \in [0, h]} \|v(t)\|^2, \end{aligned} \tag{7}$$

where the first step follows by the definition of  $x$  and the second follows by the Cauchy-Schwarz inequality. To bound  $\mathbb{E} \sup_{t \in [0, h]} \|v(t)\|^2$ ,

$$\mathbb{E} \sup_{t \in [0, h]} \|v(t)\|^2 = \mathbb{E} \sup_{t \in [0, h]} \left\| v(0) e^{-2t} - u \int_0^t e^{-2(t-s)} \nabla f(x(s)) \, ds + 2\sqrt{u} \int_0^t e^{-2(t-s)} \, dB_s \right\|^2$$

$$\begin{aligned}
&\leq 3 \|v(0)\|^2 + 3u^2 h^2 \mathbb{E} \sup_{t \in [0, h]} \|\nabla f(x(t))\|^2 + 12u \mathbb{E} \sup_{t \in [0, h]} \left\| \int_0^t e^{-2(t-s)} dB_s \right\|^2 \\
&\leq 3 \|v(0)\|^2 + 3u^2 h^2 \mathbb{E} \sup_{t \in [0, h]} \|\nabla f(x(t))\|^2 + 60udh,
\end{aligned} \tag{8}$$

where the first step follows by the definition of ULD, the second step follows by the inequality  $(a + b + c)^2 \leq 3a^2 + 3b^2 + 3c^2$  and the third step follows by Lemma 8. Then, combining (6), (7) and (8), we have

$$\begin{aligned}
\mathbb{E} \sup_{t \in [0, h]} \|\nabla f(x(t))\|^2 &\leq 2 \|\nabla f(x(0))\|^2 + 2L^2 \mathbb{E} \sup_{t \in [0, h]} \|x(0) - x(t)\|^2 \\
&\leq 2 \|\nabla f(x(0))\|^2 + 2L^2 h^2 \mathbb{E} \sup_{t \in [0, h]} \|v(t)\|^2 \\
&\leq 2 \|\nabla f(x(0))\|^2 + 6h^4 \mathbb{E} \sup_{t \in [0, h]} \|\nabla f(x(t))\|^2 + 6L^2 h^2 \|v(0)\|^2 + 120Ldh^3.
\end{aligned}$$

Since  $6h^4 \leq \frac{1}{4}$ ,

$$\begin{aligned}
\mathbb{E} \sup_{t \in [0, h]} \|\nabla f(x(t))\|^2 &\leq 3 \|\nabla f(x(0))\|^2 + 8L^2 h^2 \|v(0)\|^2 + 160Ldh^3 \\
&\leq O\left(\|\nabla f(x(0))\|^2 + L^2 h^2 \|v(0)\|^2 + Ldh^3\right).
\end{aligned} \tag{9}$$

By (8) and (9),

$$\begin{aligned}
\mathbb{E} \sup_{t \in [0, h]} \|v(t)\|^2 &\leq 3 \|v(0)\|^2 + 3u^2 h^2 \mathbb{E} \sup_{t \in [0, h]} \|\nabla f(x(t))\|^2 + 60udh \\
&\leq 3 \|v(0)\|^2 + 3u^2 h^2 \cdot O\left(\|\nabla f(x(0))\|^2 + L^2 h^2 \|v(0)\|^2 + Ldh^3\right) + 60udh \\
&\leq O\left(\|v(0)\|^2 + u^2 h^2 \|\nabla f(x(0))\|^2 + udh\right).
\end{aligned}$$

where the last step follows by  $h$  is small.

By (7) and (9),

$$\begin{aligned}
\mathbb{E} \sup_{t \in [0, h]} \|x(0) - x(t)\|^2 &\leq h^2 \mathbb{E} \sup_{t \in [0, h]} \|v(t)\|^2 \\
&\leq O\left(h^2 \|v(0)\|^2 + u^2 h^4 \|\nabla f(x(0))\|^2 + udh^3\right).
\end{aligned} \tag{10}$$

To prove the fourth claim,

$$\begin{aligned}
&\inf_{t \in [0, h]} \|v(t)\|^2 \\
&= \inf_{t \in [0, h]} \left\| v(0)e^{-2t} - u \int_0^t e^{-2(t-s)} \nabla f(x(s)) ds + 2\sqrt{u} \int_0^t e^{-2(t-s)} dB_s \right\|^2 \\
&\geq \inf_{t \in [0, h]} \left[ e^{-4t} \|v(0)\|^2 - 2e^{-2t} v(0)^T \left( u \int_0^t e^{-2(t-s)} \nabla f(x(s)) ds \right) \right. \\
&\quad \left. + 2e^{-2t} v(0)^T \left( 2\sqrt{u} \int_0^t e^{-2(t-s)} dB_s \right) \right] \\
&\geq \inf_{t \in [0, h]} \left[ e^{-4t} \|v(0)\|^2 - \frac{1}{2} e^{-4t} \|v(0)\|^2 - 4 \left\| u \int_0^t e^{-2(t-s)} \nabla f(x(s)) ds \right\|^2 \right. \\
&\quad \left. - 4 \left\| 2\sqrt{u} \int_0^t e^{-2(t-s)} dB_s \right\|^2 \right] \\
&\geq \inf_{t \in [0, h]} \left[ \frac{1}{2} (1 - 4h) \|v(0)\|^2 - 4u^2 h^2 \sup_{s \in [0, t]} \|\nabla f(x(s))\|^2 - 16u \left\| \int_0^t e^{-2(t-s)} dB_s \right\|^2 \right]
\end{aligned}$$

$$\geq \frac{1}{2}(1-4h)\|v(0)\|^2 - 4u^2h^2 \sup_{t \in [0,h]} \|\nabla f(x(t))\|^2 - 16u \sup_{t \in [0,h]} \left\| \int_0^t e^{-2(t-s)} dB_s \right\|^2,$$

where the first step follows by the definition of  $v$ , the second step follows by the inequality  $(a+b+c)^2 \geq a^2 + 2a(b+c)$ , the third step follows by the inequality  $2ab \leq a^2 + b^2$ , the fourth step follows by  $e^{-4t} \geq 1-4t$ , and the last step follows by  $h$  is small.

Then, by (9) and Lemma 8,

$$-\mathbb{E} \inf_{t \in [0,h]} \|v(t)\|^2 \leq -\frac{1}{3}\|v(0)\|^2 + O\left(u^2h^2 \|\nabla f(x(0))\|^2 + u dh\right).$$

To show the lower bound on  $\mathbb{E} \inf_{t \in [0,h]} \|\nabla f(x(t))\|^2$ , notice that

$$\begin{aligned} \mathbb{E} \inf_{t \in [0,h]} \|\nabla f(x(t))\|^2 &\geq \frac{1}{2} \|\nabla f(x(0))\|^2 - \mathbb{E} \sup_{t \in [0,h]} \|\nabla f(x(t)) - \nabla f(x(0))\|^2 \\ &\geq \frac{1}{2} \|\nabla f(x(0))\|^2 - L^2 \mathbb{E} \sup_{t \in [0,h]} \|x(t) - x(0)\|^2. \end{aligned}$$

Then, by (10) and  $h \leq \frac{1}{20}$ ,

$$-\mathbb{E} \inf_{t \in [0,h]} \|\nabla f(x(t))\| \leq -\frac{1}{3} \|\nabla f(x(0))\|^2 + O\left(h^2 L^2 \|v(0)\|^2 + L dh^3\right).$$

□

## B.2 Properties of the Brownian Motion

**Lemma 7** (Doob's maximal inequality [16]). *Suppose  $\{X(t) : t \geq 0\}$  is a continuous martingale. Then, for any  $t \geq 0$ ,*

$$\mathbb{E} \left[ \sup_{0 \leq s \leq t} |X(s)|^2 \right] \leq 4\mathbb{E} [ |X(t)|^2 ].$$

Using the Doob's maximal inequality, we can show the following lemma.

**Lemma 8.** *For  $d$ -dimensional Brownian motion  $B_t$  on  $t \in [0, h]$ , assuming  $h \leq \frac{1}{10}$ ,*

$$\mathbb{E} \left[ \sup_{0 \leq t \leq h} \|B(t)\|^2 \right] \leq 4dh, \text{ and } \mathbb{E} \left[ \sup_{0 \leq t \leq h} \left\| \int_0^t e^{-2(t-s)} dB_s \right\|^2 \right] \leq 5dh.$$

*Proof.* To show the first inequality,

$$\begin{aligned} \mathbb{E} \left[ \sup_{0 \leq t \leq h} \|B(t)\|^2 \right] &\leq \sum_{i=1}^d \mathbb{E} \left[ \sup_{0 \leq t \leq h} |B_i(t)|^2 \right] \\ &\leq 4d\mathbb{E} [ |B_i(h)|^2 ] \\ &= 4dh, \end{aligned}$$

where the second step follows by Lemma 7. To show the second inequality,

$$\begin{aligned} \mathbb{E} \left[ \sup_{0 \leq t \leq h} \left\| \int_0^t e^{-2(t-s)} dB_s \right\|^2 \right] &\leq \mathbb{E} \left[ \sup_{0 \leq t \leq h} e^{-4t} \left\| \int_0^t e^{2s} dB_s \right\|^2 \right] \\ &\leq \mathbb{E} \left[ \sup_{0 \leq t \leq h} \left\| \int_0^t e^{2s} dB_s \right\|^2 \right] \\ &\leq \sum_{i=1}^d \mathbb{E} \left[ \sup_{0 \leq t \leq h} \left| \int_0^t e^{2s} dB_{s,i} \right|^2 \right] \end{aligned}$$

$$\begin{aligned}
&\leq 4 \sum_{i=1}^d \mathbb{E} \left[ \left| \int_0^h e^{2s} dB_{s,i} \right|^2 \right] \\
&= 4 \sum_{i=1}^d \int_0^h e^{4s} ds \\
&\leq 5dh,
\end{aligned}$$

where the second step follows by  $e^{-4t} \leq 1$ , the fourth step follows by Lemma 7 and the last inequality follows by  $\int_0^h e^{4s} ds \leq \frac{5}{4}h$  for  $h \leq \frac{1}{10}$ .  $\square$

## C Discretization Error of Algorithm 1

In this section, we bound the discretization error of Algorithm 1 in each iteration. In order to prove Lemma 2, we first prove Lemma 9, stated next.

**Lemma 9.** *Let  $\alpha$  be the random number chosen in iteration  $n$ . Let  $x_{n+\frac{1}{2}}$  be the intermediate value computed in iteration  $n$  of Algorithm 1. Let  $\{x_n^*(t)\}_{t \in [0,h]}$  be the ideal underdamped Langevin diffusion starting from  $x_n^*(0) = x_n$  coupled through a shared Brownian motion with  $x_{n+\frac{1}{2}}$ . Assume that  $h \leq \frac{1}{20}$ . Then,*

$$\mathbb{E} \left\| \nabla f(x_{n+\frac{1}{2}}) - \nabla f(x_n^*(\alpha h)) \right\|^2 \leq O \left( h^6 L^2 \|v_n\|^2 + h^8 \|\nabla f(x_n)\|^2 + Ldh^7 \right).$$

*Proof.* We have the bound

$$\begin{aligned}
&\mathbb{E} \left\| \nabla f(x_{n+\frac{1}{2}}) - \nabla f(x_n^*(\alpha h)) \right\|^2 \\
&\leq L^2 \mathbb{E} \left\| x_{n+\frac{1}{2}} - x_n^*(\alpha h) \right\|^2 \\
&= L^2 \mathbb{E} \left\| \frac{1}{2} u \int_0^{\alpha h} \left( 1 - e^{-2(\alpha h-s)} \right) (\nabla f(x_n^*(0)) - \nabla f(x_n^*(s))) ds \right\|^2 \\
&\leq \frac{1}{4} \mathbb{E} \left[ \int_0^{\alpha h} \left( 1 - e^{-2(\alpha h-s)} \right)^2 ds \cdot \alpha h \cdot \left( \sup_{t \in [0,h]} \|\nabla f(x_n^*(0)) - \nabla f(x_n^*(t))\|^2 \right) \right] \\
&\leq h^4 \mathbb{E} \sup_{t \in [0,h]} \|\nabla f(x_n^*(0)) - \nabla f(x_n^*(t))\|^2 \\
&\leq L^2 h^4 \mathbb{E} \sup_{t \in [0,h]} \|x_n^*(0) - x_n^*(t)\|^2 \\
&\leq O \left( h^6 L^2 \|v_n\|^2 + h^8 \|\nabla f(x_n)\|^2 + Ldh^7 \right),
\end{aligned}$$

where the first and the fifth step follows by  $\nabla f$  is  $L$ -Lipschitz, the third step follows by Cauchy-Schwarz inequality, the fourth step follows by  $1 - e^{-2(\alpha h-t)} \leq 2h$  and the last step follows by Lemma 6.  $\square$

Now, we are ready to prove Lemma 2.

*Proof.* To show the first claim,

$$\begin{aligned}
&\|\mathbb{E}_\alpha x_{n+1} - x_n^*(h)\|^2 \\
&= \left\| \mathbb{E}_\alpha \frac{1}{2} u h \left( 1 - e^{-2(h-\alpha h)} \right) \nabla f(x_{n+\frac{1}{2}}) - \frac{1}{2} u \int_0^h \left( 1 - e^{-2(h-s)} \right) \nabla f(x_n^*(s)) ds \right\|^2 \\
&\leq \frac{1}{2} \mathbb{E}_\alpha \left\| u h \left( 1 - e^{-2(h-\alpha h)} \right) \nabla f(x_{n+\frac{1}{2}}) - u h \left( 1 - e^{-2(h-\alpha h)} \right) \nabla f(x_n^*(\alpha h)) \right\|^2
\end{aligned}$$

$$\begin{aligned}
& + \frac{1}{2} \left\| \mathbb{E}_\alpha u h \left( 1 - e^{-2(h-\alpha h)} \right) \nabla f(x_n^*(\alpha h)) - u \int_0^h \left( 1 - e^{-2(h-s)} \right) \nabla f(x_n^*(s)) ds \right\|^2 \\
& \leq \frac{1}{2} u^2 h^2 \mathbb{E}_\alpha \left[ \left( 1 - e^{-2(h-\alpha h)} \right)^2 \left\| \nabla f(x_{n+\frac{1}{2}}) - \nabla f(x_n^*(\alpha h)) \right\|^2 \right] + 0 \\
& \leq 2u^2 h^4 \mathbb{E}_\alpha \left\| \nabla f(x_{n+\frac{1}{2}}) - \nabla f(x_n^*(\alpha h)) \right\|^2,
\end{aligned}$$

where the first step follows by the definition of  $x_{n+1}$ , the second step follows by Young's inequality, the third step follows by

$$\mathbb{E}_\alpha h \left( 1 - e^{-2(h-\alpha h)} \right) \nabla f(x_n^*(\alpha h)) = \int_0^h \left( 1 - e^{-2(h-s)} \right) \nabla f(x_n^*(s)) ds,$$

and the fourth step follows by  $1 - e^{-2(h-\alpha h)} \leq 2h$ . By Lemma 9,

$$\mathbb{E} \left\| \mathbb{E}_\alpha x_{n+1} - x_n^*(h) \right\|^2 \leq O \left( h^{10} \|v_n\|^2 + u^2 h^{12} \|\nabla f(x_n)\|^2 + u d h^{11} \right).$$

To show the second claim,

$$\begin{aligned}
& \mathbb{E} \left\| x_{n+1} - x_n^*(h) \right\|^2 \\
& \leq \frac{3}{4} \mathbb{E} \left\| u h \left( 1 - e^{-2(h-\alpha h)} \right) \nabla f(x_{n+\frac{1}{2}}) - u h \left( 1 - e^{-2(h-\alpha h)} \right) \nabla f(x_n^*(\alpha h)) \right\|^2 \\
& \quad + \frac{3}{4} \mathbb{E} \left\| u h \left( 1 - e^{-2(h-\alpha h)} \right) \nabla f(x_n^*(\alpha h)) - u \int_0^h \left( 1 - e^{-2(h-\alpha h)} \right) \nabla f(x_n^*(s)) ds \right\|^2 \\
& \quad + \frac{3}{4} \mathbb{E} \left\| u \int_0^h \left( 1 - e^{-2(h-\alpha h)} \right) \nabla f(x_n^*(s)) ds - u \int_0^h \left( 1 - e^{-2(h-s)} \right) \nabla f(x_n^*(s)) ds \right\|^2,
\end{aligned}$$

which follows by definition and Young's inequality. To bound the second term,

$$\begin{aligned}
& \left\| u h \left( 1 - e^{-2(h-\alpha h)} \right) \nabla f(x_n^*(\alpha h)) - u \int_0^h \left( 1 - e^{-2(h-\alpha h)} \right) \nabla f(x_n^*(s)) ds \right\|^2 \\
& = \left\| u \int_0^h \left( 1 - e^{-2(h-\alpha h)} \right) (\nabla f(x_n^*(\alpha h)) - \nabla f(x_n^*(s))) ds \right\|^2 \\
& \leq u^2 \int_0^h \left( 1 - e^{-2(h-\alpha h)} \right)^2 ds \cdot \sup_{t \in [0, h]} \|\nabla f(x_n^*(\alpha h)) - \nabla f(x_n^*(t))\|^2 \cdot h \\
& \leq 4u^2 h^4 \sup_{t \in [0, h]} \|\nabla f(x_n^*(\alpha h)) - \nabla f(x_n^*(t))\|^2 \\
& \leq 16h^4 \sup_{t \in [0, h]} \|x_n^*(0) - x_n^*(t)\|^2 \tag{11}
\end{aligned}$$

where the second step follows by the Cauchy-Schwarz inequality. The third term satisfies

$$\begin{aligned}
& \left\| u \int_0^h \left( 1 - e^{-2(h-\alpha h)} \right) \nabla f(x_n^*(s)) ds - u \int_0^h \left( 1 - e^{-2(h-s)} \right) \nabla f(x_n^*(s)) ds \right\|^2 \\
& = u^2 \left\| \int_0^h \left( e^{-2(h-s)} - e^{-2(h-\alpha h)} \right) \nabla f(x_n^*(s)) ds \right\|^2 \\
& \leq 4u^2 h^4 \sup_{t \in [0, h]} \|\nabla f(x_n^*(t))\|^2, \tag{12}
\end{aligned}$$

where the second step follows by the Cauchy Schwarz inequality and  $|e^{-2(h-s)} - e^{-2(h-\alpha h)}| \leq 2h$ . Thus,

$$\mathbb{E} \left\| x_{n+1} - x_n^*(h) \right\|^2$$

$$\begin{aligned}
&\leq 3u^2h^4\mathbb{E}\left\|\nabla f(x_{n+\frac{1}{2}}) - \nabla f(x_n^*(\alpha h))\right\|^2 + 12h^4\mathbb{E}\sup_{t\in[0,h]}\|x_n^*(0) - x_n^*(t)\|^2 \\
&\quad + 3u^2h^4\mathbb{E}\sup_{t\in[0,h]}\|\nabla f(x_n^*(t))\|^2 \\
&\leq 3h^4 \cdot O\left(h^6\|v_n\|^2 + h^8u^2\|\nabla f(x_n)\|^2 + u dh^7\right) \\
&\quad + 12h^4 \cdot O\left(h^2\|v_n\|^2 + u^2h^4\|\nabla f(x_n)\|^2 + u dh^3\right) \\
&\quad + 3u^2h^4 \cdot O\left(\|\nabla f(x_n)\|^2 + L^2h^2\|v_n\|^2 + M dh^3\right) \\
&\leq O\left(h^6\|v_n\|^2 + u^2h^4\|\nabla f(x_n)\|^2 + u dh^7\right).
\end{aligned}$$

where the first step follows by (11) and (12), the second step follows by Lemma 6 and Lemma 9, and the last inequality follows by  $h \leq 1$ .

To show the third claim,

$$\begin{aligned}
\mathbb{E}\|\mathbb{E}_\alpha v_{n+1} - v_n^*(h)\|^2 &= \mathbb{E}\left\|\mathbb{E}_\alpha u h e^{-2(h-\alpha h)}\nabla f(x_{n+\frac{1}{2}}) - u \int_0^h e^{-2(h-s)}\nabla f(x_n^*(s))\,ds\right\|^2 \\
&\leq 2\mathbb{E}\left\|u h e^{-2(h-\alpha h)}\nabla f(x_{n+\frac{1}{2}}) - u h e^{-2(h-\alpha h)}\nabla f(x_n^*(\alpha h))\right\|^2 \\
&\quad + 2\mathbb{E}\left\|\mathbb{E}_\alpha u h e^{-2(h-\alpha h)}\nabla f(x_n^*(\alpha h)) - u \int_0^h e^{-2(h-s)}\nabla f(x_n^*(s))\,ds\right\|^2 \\
&\leq 2u^2h^2\mathbb{E}\left\|\nabla f(x_{n+\frac{1}{2}}) - \nabla f(x_n^*(\alpha h))\right\|^2 + 0 \\
&\leq O\left(h^8\|v_n\|^2 + u^2h^{10}\|\nabla f(x_n)\|^2 + u dh^9\right),
\end{aligned}$$

where the first step follows by Young's inequality, the second step follows by

$$\mathbb{E}_\alpha u h e^{-2(h-\alpha h)}\nabla f(x_n^*(\alpha h)) = u \int_0^h e^{-2(h-t)}\nabla f(x_n^*(t))\,dt,$$

and  $e^{-2(h-\alpha h)} \leq 1$ , and the third step follows by Lemma 9.

To show the last claim,

$$\begin{aligned}
&\mathbb{E}\|v_{n+1} - v_n^*(h)\|^2 \\
&= \mathbb{E}\left\|u h e^{-2(h-\alpha h)}\nabla f(x_{n+\frac{1}{2}}) - u \int_0^h e^{-2(h-s)}\nabla f(x_n^*(s))\,ds\right\|^2 \\
&\leq 3\mathbb{E}\left\|u h e^{-2(h-\alpha h)}\nabla f(x_{n+\frac{1}{2}}) - u h e^{-2(h-\alpha h)}\nabla f(x_n^*(\alpha h))\right\|^2 \\
&\quad + 3\mathbb{E}\left\|u \int_0^h e^{-2(h-\alpha h)}\nabla f(x_n^*(\alpha h))\,dt - u \int_0^h e^{-2(h-\alpha h)}\nabla f(x_n^*(s))\,ds\right\|^2 \\
&\quad + 3\mathbb{E}\left\|u \int_0^h e^{-2(h-\alpha h)}\nabla f(x_n^*(s))\,ds - u \int_0^h e^{-2(h-s)}\nabla f(x_n^*(s))\,ds\right\|^2 \\
&\leq 3u^2h^2\mathbb{E}\left\|\nabla f(x_{n+\frac{1}{2}}) - \nabla f(x_n^*(\alpha h))\right\|^2 + 3h^2\mathbb{E}\sup_{t\in[0,h]}\|x_n^*(\alpha h) - x_n^*(t)\|^2 \\
&\quad + 12u^2h^4\mathbb{E}\sup_{t\in[0,h]}\|\nabla f(x_n^*(t))\|^2 \\
&\leq 3u^2h^2 \cdot O\left(h^6L^2\|v_n\|^2 + h^8\|\nabla f(x_n)\|^2 + L dh^7\right) \\
&\quad + 3h^2 \cdot O\left(h^2\|v_n\|^2 + u^2h^4\|\nabla f(x_n)\|^2 + u dh^3\right)
\end{aligned}$$

$$\begin{aligned}
& +12u^2h^4 \cdot O\left(\|\nabla f(x_n)\|^2 + L^2h^2\|v_n\|^2 + Ldh^3\right) \\
& \leq O\left(h^4\|v_n\|^2 + u^2h^4\|\nabla f(x_n)\|^2 + udh^5\right),
\end{aligned}$$

where the first step follows by the definition, the second step follows by Young's inequality, the third follows by  $e^{-2(h-\alpha h)} - e^{-2(h-s)} \leq 2h$ , the fourth step follows by Lemma 9 and Lemma 6 and the last inequality follows by  $h \leq 1$ .  $\square$

## D Bounds on $\|\nabla f(x)\|$ and $\|v\|$

In this section, we bound the sum of  $\|\nabla f(x_n)\|^2$  and  $\|v_n\|^2$  over all iterations  $n$ ,  $\sum_{n=0}^{N-1} \mathbb{E} \|\nabla f(x_n)\|^2$  and  $\sum_{n=0}^{N-1} \mathbb{E} \|v_n\|^2$ . In Appendix E, we use the results in this appendix together with Lemma 2 to prove the guarantee of our algorithm.

**Lemma 10.** Assume  $h \leq \frac{1}{20}$ . For each iteration  $n$ , let  $x_n$  be the starting point of iteration  $n$  of Algorithm 1. Let  $\{v_n(t), x_n(t)\}_{t \in [0, h]}$  be the solution of the exact underdamped Langevin diffusion starting from  $(v_n, x_n)$ . Let  $\mathbb{E}_\alpha$  be the expectation over the random choice of  $\alpha$  in iteration  $n$ . Then, the difference between the value of  $f$  on the starting point of iteration  $n+1$ ,  $x_{n+1}$ , and that of  $x_n(h)$  satisfies

$$\mathbb{E}f(x_{n+1}(0)) - f(x_n(h)) \leq O\left(uh^3\|\nabla f(x_n(0))\|^2 + Lh^5\|v_n(0)\|^2 + dh^6\right).$$

*Proof.* We first consider the expectation over the choice of  $\alpha$  in iteration  $n$ ,

$$\begin{aligned}
& \mathbb{E}_\alpha f(x_{n+1}(0)) \\
& \leq f(x_n(h)) + \nabla f(x_n(h))^T (\mathbb{E}_\alpha x_{n+1}(0) - x_n(h)) + \frac{L}{2} \mathbb{E}_\alpha \|x_{n+1}(0) - x_n(h)\|^2 \\
& \leq f(x_n(h)) + \|\nabla f(x_n(h))\| \|\mathbb{E}_\alpha x_{n+1}(0) - x_n(h)\| + \frac{L}{2} \mathbb{E}_\alpha \|x_{n+1}(0) - x_n(h)\|^2 \\
& \leq f(x_n(h)) + uh^3 \|\nabla f(x_n(h))\|^2 + \frac{L}{h^3} \|\mathbb{E}_\alpha x_{n+1}(0) - x_n(h)\|^2 + \frac{L}{2} \mathbb{E}_\alpha \|x_{n+1}(0) - x_n(h)\|^2,
\end{aligned}$$

where the first step follows by  $\nabla f$  is  $L$ -Lipschitz, the second step follows by Cauchy-Schwarz inequality and the third step follows by Young's inequality. By Lemma 2 and Lemma 6,

$$\begin{aligned}
\mathbb{E}f(x_{n+1}(0)) & \leq \mathbb{E}f(x_n(h)) + uh^3 \mathbb{E} \|\nabla f(x_n(h))\|^2 + \frac{L}{h^3} \mathbb{E} \|\mathbb{E}_\alpha x_{n+1}(0) - x_n(h)\|^2 \\
& \quad + \frac{L}{2} \mathbb{E} \|x_{n+1}(0) - x_n(h)\|^2 \\
& \leq \mathbb{E}f(x_n(h)) + \mathbb{E}uh^3 \cdot O\left(\|\nabla f(x_n(0))\|^2 + L^2h^2\|v_n(0)\|^2 + Ldh^3\right) \\
& \quad + \mathbb{E} \frac{L}{h^3} \cdot O\left(h^{10}\|v_n(0)\|^2 + u^2h^{12}\|\nabla f(x_n(0))\|^2 + udh^{11}\right) \\
& \quad + \mathbb{E} \frac{L}{2} \cdot O\left(h^6\|v_n(0)\|^2 + h^4u^2\|\nabla f(x_n(0))\|^2 + udh^7\right) \\
& \leq \mathbb{E}f(x_n(h)) + O\left(uh^3\mathbb{E} \|\nabla f(x_n(0))\|^2 + Lh^5\mathbb{E} \|v_n(0)\|^2 + dh^6\right).
\end{aligned}$$

where the second step follows by Lemma 2 and Lemma 6, and the last step follows by  $h \leq \frac{1}{20}$ .  $\square$

**Lemma 11.** Assume  $h$  is smaller than some given constant. For each iteration  $n = 0, \dots, N-1$ , let  $(v_n, x_n)$  be the starting point of Algorithm 1 in iteration  $n$ . Then,

$$\sum_{n=0}^{N-1} \mathbb{E} \|v_n\|^2 \leq O\left(u^2h \sum_{n=0}^{N-1} \mathbb{E} \|\nabla f(x_n)\|^2 + Nud\right).$$

*Proof.* Let  $\{v_n(t), x_n(t)\}_{t \in [0, h]}$  be the solution of the exact underdamped Langevin diffusion starting from  $(v_n, x_n)$ . By definition, for  $t \in [0, h]$ ,

$$\frac{df(x_n(t))}{dt} = \nabla f(x_n(t))^T \frac{dx_n(t)}{dt}$$



$$= \nabla f(x_n(t))^T v_n(t),$$

so

$$\begin{aligned} f(x_n(h)) &= f(x_n(0)) + \int_0^h df(x_n(t)) \\ &= f(x_n(0)) + \int_0^h \nabla f(x_n(t))^T v_n(t) dt. \end{aligned} \quad (13)$$

Also, since

$$dv_n(t) = (-2v_n(t) - u\nabla f(x_n(t))) dt + 2\sqrt{u} dB_t,$$

by Ito's lemma,

$$\begin{aligned} d\frac{1}{2}\|v_n(t)\|^2 &= \langle v_n(t), 2\sqrt{u} dB_t \rangle + \left( \langle v_n(t), -2v_n(t) - u\nabla f(x_n(t)) \rangle + \frac{1}{2} \cdot 4u \text{Tr}(I_d) \right) dt \\ &= 2\sqrt{u}v_n(t)^T dB_t + \left( -2\|v_n(t)\|^2 - uv_n(t)^T \nabla f(x_n(t)) + 2ud \right) dt, \end{aligned}$$

and therefore

$$\mathbb{E} \frac{1}{2u} \|v_n(h)\|^2 = \mathbb{E} \frac{1}{2u} \|v_n(0)\|^2 + \mathbb{E} \int_0^h \left( 4d - \frac{2}{u} \|v_n(t)\|^2 - v_n(t)^T \nabla f(x_n(t)) + 2d \right) dt. \quad (14)$$

Now, we consider the term  $\frac{1}{2u} \|v_n(h)\|^2 + f(x_n(h))$ . By (13) and (14),

$$\begin{aligned} &\mathbb{E} \left[ \frac{1}{2u} \|v_n(h)\|^2 + f(x_n(h)) \right] \\ &= \mathbb{E} \left[ \frac{1}{2u} \|v_n(0)\|^2 + f(x_n(0)) + \int_0^h \left( -\frac{2}{u} \|v_n(t)\|^2 + 6d \right) dt \right] \\ &\leq \mathbb{E} \left[ \frac{1}{2u} \|v_n(0)\|^2 + f(x_n(0)) - \frac{2}{u} h \inf_{t \in [0, h]} \|v_n(t)\|^2 + 6dh \right] \\ &\leq \mathbb{E} \left[ \frac{1}{2u} \|v_n(0)\|^2 + f(x_n(0)) \right] - \frac{2}{3} hL \mathbb{E} \|v_n(0)\|^2 + O \left( uh^3 \mathbb{E} \|\nabla f(x_n(0))\|^2 + dh \right), \end{aligned}$$

where the first step follows by (13) and (14) and the third step follows by Lemma 6.

Since

$$\begin{aligned} &\mathbb{E} \left[ \|v_{n+1}(0)\|^2 - \|v_n(h)\|^2 \right] \\ &= \mathbb{E} (v_{n+1}(0) - v_n(h))^T (v_{n+1}(0) + v_n(h)) \\ &\leq \frac{1}{h^2} \mathbb{E} \|v_{n+1}(0) - v_n(h)\|^2 + \frac{1}{2} h^2 \mathbb{E} \|v_{n+1}(0) + v_n(h)\|^2 \\ &\leq \frac{1}{h^2} \mathbb{E} \|v_{n+1}(0) - v_n(h)\|^2 + h^2 \mathbb{E} \|v_{n+1}(0) - v_n(h)\|^2 + 4h^2 \mathbb{E} \|v_n(h)\|^2 \\ &\leq \frac{2}{h^2} \mathbb{E} \|v_{n+1}(0) - v_n(h)\|^2 + 4h^2 \mathbb{E} \|v_n(h)\|^2 \\ &\leq O \left( h^2 \mathbb{E} \|v_n(0)\|^2 + u^2 h^2 \mathbb{E} \|\nabla f(x_n(0))\|^2 + u d h^3 \right), \end{aligned}$$

where the first inequality follows by the inequality  $2ab \leq a^2 + b^2$ , the second inequality follows by Young's inequality and the last inequality follows by Lemma 2 and Lemma 6.

Since

$$\mathbb{E} f(x_{n+1}(0)) - f(x_n(h)) \leq O \left( uh^3 \mathbb{E} \|\nabla f(x_n(0))\|^2 + Lh^5 \mathbb{E} \|v_n(0)\|^2 + dh^6 \right),$$

which is shown in Lemma 10, we have

$$\mathbb{E} \left[ \frac{1}{2u} \|v_{n+1}(0)\|^2 + f(x_{n+1}(0)) \right]$$

$$\begin{aligned}
&\leq \mathbb{E} \left[ \frac{1}{2u} \|v_n(0)\|^2 + f(x_n(0)) \right] - \frac{2}{3} hL \mathbb{E} \|v_n(0)\|^2 + O \left( uh^3 \mathbb{E} \|\nabla f(x_n(0))\|^2 + dh \right) \\
&\quad + O \left( h^2 L \mathbb{E} \|v_n(0)\|^2 + uh^2 \mathbb{E} \|\nabla f(x_n(0))\|^2 + dh^3 \right) \\
&\quad + O \left( uh^3 \mathbb{E} \|\nabla f(x_n(0))\|^2 + Lh^5 \mathbb{E} \|v_n(0)\|^2 + dh^6 \right) \\
&\leq \mathbb{E} \left[ \frac{1}{2u} \|v_n(0)\|^2 + f(x_n(0)) \right] - \frac{1}{3} hL \mathbb{E} \|v_n(0)\|^2 + O \left( uh^2 \mathbb{E} \|\nabla f(x_n(0))\|^2 + hd \right),
\end{aligned}$$

where the last step follows by  $h$  is small. Summing  $n$  from 0 to  $N - 1$ , we get

$$\begin{aligned}
&\sum_{n=0}^{N-1} \mathbb{E} \left[ \frac{1}{2u} \|v_{n+1}(0)\|^2 + f(x_{n+1}(0)) \right] \\
&\leq \sum_{n=0}^{N-1} \mathbb{E} \left[ \frac{1}{2u} \|v_n(0)\|^2 + f(x_n(0)) \right] - \frac{1}{3} hL \sum_{n=0}^{N-1} \mathbb{E} \|v_n(0)\|^2 \\
&\quad + O \left( uh^2 \sum_{n=0}^{N-1} \mathbb{E} \|\nabla f(x_n(0))\|^2 + Nhd \right).
\end{aligned}$$

Since  $\|v_0(0)\| = 0$  and  $f(x_0(0)) \leq f(x_N(0))$ ,

$$\frac{1}{3} hL \sum_{n=0}^{N-1} \mathbb{E} \|v_n(0)\|^2 \leq O \left( uh^2 \sum_{n=0}^{N-1} \mathbb{E} \|\nabla f(x_n(0))\|^2 + Nhd \right),$$

which implies

$$\sum_{n=0}^{N-1} \mathbb{E} \|v_n(0)\|^2 \leq O \left( u^2 h \sum_{n=0}^{N-1} \mathbb{E} \|\nabla f(x_n(0))\|^2 + Nud \right).$$

□

**Lemma 12.** Assume  $h$  is smaller than some given constant. For each iteration  $n = 0, \dots, N - 1$ , let  $(v_n, x_n)$  be the starting point of Algorithm 1 in iteration  $n$ . Then, the  $x_n$  in iteration  $n = 0, \dots, N - 1$  satisfies

$$\sum_{n=0}^{N-1} \mathbb{E} \|\nabla f(x_n)\|^2 \leq O \left( NLd + \frac{L}{h} |\mathbb{E} \nabla f(x_N)^T v_N| \right).$$

Furthermore, the  $v_n$  in iteration  $n = 0, \dots, N - 1$  satisfies

$$\sum_{n=0}^{N-1} \mathbb{E} \|v_n\|^2 \leq O \left( Nud + u |\mathbb{E} \nabla f(x_N)^T v_N| \right).$$

*Proof.* For each iteration  $n = 0, \dots, N - 1$ , let  $\{v_n(t), x_n(t)\}_{t \in [0, h]}$  be the exact underdamped Langevin diffusion starting from  $(v_n, x_n)$  computed in Algorithm 1. By definition,

$$\begin{aligned}
&\mathbb{E} [\mathrm{d}\nabla f(x_n(t))^T v_n(t)] \\
&= \mathbb{E} [v_n(t)^T \nabla^2 f(x_n(t)) v_n(t) + \nabla f(x_n(t))^T \mathrm{d}v_n(t)] \\
&= \mathbb{E} [v_n(t)^T \nabla^2 f(x_n(t)) v_n(t) - 2\nabla f(x_n(t))^T v_n(t) - u \|\nabla f(x_n(t))\|^2].
\end{aligned}$$

So we have

$$\begin{aligned}
&\mathbb{E} [\nabla f(x_n(h))^T v_n(h)] \\
&= \mathbb{E} \left[ \nabla f(x_n(0))^T v_n(0) + \int_0^h \mathrm{d}\nabla f(x_n(t))^T v_n(t) \right]
\end{aligned}$$

$$\begin{aligned}
&= \mathbb{E} \left[ \nabla f(x_n(0))^T v_n(0) + \int_0^h v_n(t)^T \nabla^2 f(x_n(t)) v_n(t) - 2 \nabla f(x_n(t))^T v_n(t) \right. \\
&\quad \left. - u \|\nabla f(x_n(t))\|^2 dt \right] \\
&\leq \mathbb{E} \left[ \nabla f(x_n(0))^T v_n(0) + 3L \int_0^h \|v_n(t)\|^2 dt - \frac{1}{2} \int_0^h u \|\nabla f(x_n(t))\|^2 dt \right] \\
&\leq \mathbb{E} \left[ \nabla f(x_n(0))^T v_n(0) + 3Lh \sup_{t \in [0, h]} \|v_n(t)\|^2 - \frac{1}{2} hu \inf_{t \in [0, h]} \|\nabla f(x_n(t))\|^2 \right] \\
&\leq \mathbb{E} \nabla f(x_n(0))^T v_n(0) - \frac{1}{6} hu \mathbb{E} \|\nabla f(x_n(0))\|^2 + O \left( h^3 L \mathbb{E} \|v_n(0)\|^2 + dh^4 \right) \\
&\quad + 3Lh \cdot O \left( \mathbb{E} \|v_n(0)\|^2 + u^2 h^2 \mathbb{E} \|\nabla f(x_n(0))\|^2 + u dh \right) \\
&\leq \mathbb{E} \nabla f(x_n(0))^T v_n(0) - \frac{1}{6} hu \mathbb{E} \|\nabla f(x_n(0))\|^2 \\
&\quad + O \left( Lh \mathbb{E} \|v_n(0)\|^2 + uh^3 \mathbb{E} \|\nabla f(x_n(0))\|^2 + dh^2 \right), \tag{15}
\end{aligned}$$

where the third step follows by Young's inequality, the fifth step follows by Lemma 6 and the last step follows by  $h$  is small. Also, we have

$$\begin{aligned}
&\mathbb{E} [\nabla f(x_{n+1}(0))^T v_{n+1}(0) - \nabla f(x_n(h))^T v_n(h)] \\
&= \mathbb{E} (\nabla f(x_{n+1}(0)) - \nabla f(x_n(h)) + \nabla f(x_n(h)))^T (v_{n+1}(0) - v_n(h)) \\
&\quad + \mathbb{E} (\nabla f(x_{n+1}(0)) - \nabla f(x_n(h)))^T v_n(h) \\
&\leq u \mathbb{E} \|\nabla f(x_{n+1}(0)) - \nabla f(x_n(h))\|^2 + L \mathbb{E} \|v_{n+1}(0) - v_n(h)\|^2 + uh^2 \mathbb{E} \|\nabla f(x_n(h))\|^2 \\
&\quad + \frac{L}{h^2} \mathbb{E} \|v_{n+1}(0) - v_n(h)\|^2 + \frac{u}{h} \mathbb{E} \|\nabla f(x_{n+1}(0)) - \nabla f(x_n(h))\|^2 + hL \mathbb{E} \|v_n(h)\|^2 \\
&\leq \frac{2u}{h} \mathbb{E} \|\nabla f(x_{n+1}(0)) - \nabla f(x_n(h))\|^2 + \frac{2L}{h^2} \mathbb{E} \|v_{n+1}(0) - v_n(h)\|^2 + uh^2 \mathbb{E} \|\nabla f(x_n(h))\|^2 \\
&\quad + hL \mathbb{E} \|v_n(h)\|^2 \\
&\leq \frac{2L}{h} \cdot O \left( h^6 \mathbb{E} \|v_n(0)\|^2 + h^4 u^2 \mathbb{E} \|\nabla f(x_n(0))\|^2 + u dh^7 \right) \\
&\quad + \frac{2L}{h^2} \cdot O \left( h^4 \mathbb{E} \|v_n(0)\|^2 + u^2 h^4 \mathbb{E} \|\nabla f(x_n(0))\|^2 + u dh^5 \right) \\
&\quad + uh^2 \cdot O \left( \mathbb{E} \|\nabla f(x_n(0))\|^2 + L^2 h^2 \mathbb{E} \|v_n(0)\|^2 + L dh^3 \right) \\
&\quad + hL \cdot O \left( \mathbb{E} \|v_n(0)\|^2 + u^2 h^2 \mathbb{E} \|\nabla f(x_n(0))\|^2 + u dh \right) \\
&\leq O \left( hL \mathbb{E} \|v_n(0)\|^2 + uh^2 \mathbb{E} \|\nabla f(x_n(0))\|^2 + dh^2 \right), \tag{16}
\end{aligned}$$

where the second step follows by Young's inequality and the fourth step follows by Lemma 2 and Lemma 6. Combining (15) and (16),

$$\begin{aligned}
\mathbb{E} \nabla f(x_{n+1}(0))^T v_{n+1}(0) &\leq \mathbb{E} \nabla f(x_n(0))^T v_n(0) - \frac{1}{6} hu \mathbb{E} \|\nabla f(x_n(0))\|^2 \\
&\quad + O \left( Lh \mathbb{E} \|v_n(0)\|^2 + uh^3 \mathbb{E} \|\nabla f(x_n(0))\|^2 + dh^2 \right) \\
&\quad + O \left( Lh \mathbb{E} \|v_n(0)\|^2 + uh^2 \mathbb{E} \|\nabla f(x_n(0))\|^2 + dh^2 \right) \\
&\leq \mathbb{E} \nabla f(x_n(0))^T v_n(0) - \frac{1}{6} hu \mathbb{E} \|\nabla f(x_n(0))\|^2 \\
&\quad + O \left( Lh \mathbb{E} \|v_n(0)\|^2 + uh^2 \mathbb{E} \|\nabla f(x_n(0))\|^2 + dh^2 \right).
\end{aligned}$$

Summing from  $n = 0$  to  $N - 1$ ,

$$\begin{aligned}
\sum_{n=0}^{N-1} \mathbb{E} \nabla f(x_{n+1}(0))^T v_{n+1}(0) &\leq \sum_{n=0}^{N-1} \mathbb{E} \nabla f(x_n(0))^T v_n(0) - \frac{1}{6} h u \sum_{n=0}^{N-1} \mathbb{E} \|\nabla f(x_n(0))\|^2 \\
&\quad + O\left(Lh \sum_{n=0}^{N-1} \mathbb{E} \|v_n(0)\|^2 + u h^2 \sum_{n=0}^{N-1} \mathbb{E} \|\nabla f(x_n(0))\|^2 + N d h^2\right) \\
&\leq \sum_{n=0}^{N-1} \mathbb{E} \nabla f(x_n(0))^T v_n(0) - \frac{1}{6} h u \sum_{n=0}^{N-1} \|\nabla f(x_n(0))\|^2 \\
&\quad + O\left(Lh \left(u^2 h \sum_{n=0}^{N-1} \mathbb{E} \|\nabla f(x_n(0))\|^2 + N u d\right) + N d h^2\right) \\
&\leq \sum_{n=0}^{N-1} \mathbb{E} \nabla f(x_n(0))^T v_n(0) - \frac{1}{8} h u \sum_{n=0}^{N-1} \|\nabla f(x_n(0))\|^2 + O(N d h),
\end{aligned}$$

where the second step follows by Lemma 11 and the last step follows by  $h$  is small. Then, since  $v_0 = 0$ ,

$$\frac{1}{8} h u \sum_{n=0}^{N-1} \mathbb{E} \|\nabla f(x_n(0))\|^2 \leq O(N d h + |\mathbb{E} \nabla f(x_N(0))^T v_N(0)|),$$

which implies

$$\sum_{n=0}^{N-1} \mathbb{E} \|\nabla f(x_n(0))\|^2 \leq O\left(N L d + \frac{L}{h} |\mathbb{E} \nabla f(x_N(0))^T v_N(0)|\right).$$

By Lemma 11,

$$\begin{aligned}
\sum_{n=0}^{N-1} \mathbb{E} \|v_n(0)\|^2 &\leq O\left(u^2 h \sum_{n=0}^{N-1} \mathbb{E} \|\nabla f(x_n(0))\|^2 + N u d\right) \\
&\leq O(N u d + u |\mathbb{E} \nabla f(x_N(0))^T v_N(0)|).
\end{aligned}$$

□

## E Proof of Theorem 3

Here, we combine Lemma 12 and Lemma 2 to prove our main result.

*Proof.* Let  $x_{n+\frac{1}{2}}$ ,  $x_n$  and  $v_n$  be the iterates of Algorithm 1. Let  $(y_n, w_n)$  be the  $n$ -th step of the exact underdamped Langevin diffusion, starting from a random point  $(y_0, w_0) \propto \exp\left(-\left(f(y) + \frac{L}{2} \|w\|^2\right)\right)$ , coupled with  $(x_n, v_n)$  through the same Brownian motion. Let  $(x_{n+1}^*, v_{n+1}^*)$  be the 1-step exact Langevin diffusion starting from  $(x_n, v_n)$ . For any iteration  $n$ , let  $\mathbb{E}_\alpha$  be the expectation taken over the random choice of  $\alpha$  in iteration  $n$ . Then,

$$\begin{aligned}
&\mathbb{E}_\alpha \left[ \|x_n - y_n\|^2 + \|(x_n + v_n) - (y_n + w_n)\|^2 \right] \\
&= \mathbb{E}_\alpha \left[ \|(x_n - x_n^*) - (y_n - x_n^*)\|^2 + \|(x_n + v_n - x_n^* - v_n^*) - (y_n + w_n - x_n^* - v_n^*)\|^2 \right] \\
&\leq \|y_n - x_n^*\|^2 + \|y_n + w_n - x_n^* - v_n^*\|^2 + \mathbb{E}_\alpha \|x_n - x_n^*\|^2 + \mathbb{E}_\alpha \|x_n + v_n - x_n^* - v_n^*\|^2 \\
&\quad - 2(y_n - x_n^*)^T (\mathbb{E}_\alpha x_n - x_n^*) - 2(y_n + w_n - x_n^* - v_n^*)^T (\mathbb{E}_\alpha [x_n + v_n] - x_n^* - v_n^*) \\
&\leq \left(1 + \frac{h}{2\kappa}\right) \left(\|y_n - x_n^*\|^2 + \|y_n + w_n - x_n^* - v_n^*\|^2\right) \\
&\quad + \frac{2\kappa}{h} \left(\|\mathbb{E}_\alpha x_n - x_n^*\|^2 + \|\mathbb{E}_\alpha [x_n + v_n] - x_n^* - v_n^*\|^2\right) + \mathbb{E}_\alpha \|x_n - x_n^*\|^2
\end{aligned}$$

$$+ \mathbb{E}_\alpha \|x_n + v_n - x_n^* - v_n^*\|^2,$$

where the second step follows by  $y_n, w_n, x_n^*$  and  $v_n^*$  are independent of the choice of  $\alpha$  and the third follows by Young's inequality. Then,

$$\begin{aligned} & \mathbb{E} \left[ \|x_N - y_N\|^2 + \|(x_N + v_N) - (y_N + w_N)\|^2 \right] \\ & \leq \left( 1 + \frac{h}{2\kappa} \right) e^{-\frac{h}{\kappa}} \mathbb{E} \left[ \|y_{N-1} - x_{N-1}\|^2 + \|y_{N-1} + w_{N-1} - x_{N-1} - v_{N-1}\|^2 \right] \\ & \quad + \frac{2\kappa}{h} \left( \mathbb{E} \|\mathbb{E}_\alpha x_N - x_N^*\|^2 + \mathbb{E} \|\mathbb{E}_\alpha x_N + v_N - x_N^* - v_N^*\|^2 \right) \\ & \quad + \left( \mathbb{E} \|x_N - x_N^*\|^2 + \mathbb{E} \|x_N + v_N - x_N^* - v_N^*\|^2 \right) \\ & \leq e^{-\frac{h}{2\kappa}} \mathbb{E} \left[ \|y_{N-1} - x_{N-1}\|^2 + \|y_{N-1} + w_{N-1} - x_{N-1} - v_{N-1}\|^2 \right] \\ & \quad + \frac{2\kappa}{h} \left( 2\mathbb{E} \|\mathbb{E}_\alpha v_N - v_N^*\|^2 + 3\mathbb{E} \|\mathbb{E}_\alpha x_N - x_N^*\|^2 \right) + \left( 2\mathbb{E} \|v_N - v_N^*\|^2 + 3\mathbb{E} \|x_N - x_N^*\|^2 \right) \\ & \leq e^{-\frac{Nh}{2\kappa}} \mathbb{E} \left[ \|y_0 - x_0\|^2 + \|y_0 + w_0 - x_0 - v_0\|^2 \right] \\ & \quad + \sum_{n=1}^N \frac{2\kappa}{h} \left( 2\mathbb{E} \|\mathbb{E}_\alpha v_n - v_n^*\|^2 + 3\mathbb{E} \|\mathbb{E}_\alpha x_n - x_n^*\|^2 \right) \\ & \quad + \sum_{n=1}^N \left( 2\mathbb{E} \|v_n - v_n^*\|^2 + 3\mathbb{E} \|x_n - x_n^*\|^2 \right), \end{aligned}$$

where the first step follows by Lemma 1, the second step follows by  $1 + \frac{h}{2\kappa} \leq e^{\frac{h}{2\kappa}}$ , and the last step follows by induction.

Since  $(y_N, w_N)$  follows the distribution  $p^* \propto \exp \left( - \left( f(y) + \frac{L}{2} \|w\|^2 \right) \right)$ ,  $\mathbb{E} \|w_N\|^2 = \frac{d}{L}$ . By Proposition 1 of [19],  $\mathbb{E} \|y_0 - x_0\|^2 \leq \frac{d}{m}$ . Then,

$$\begin{aligned} \mathbb{E} \left[ \|y_0 - x_0\|^2 + \|y_0 + w_0 - x_0 - v_0\|^2 \right] & \leq 3\mathbb{E} \|y_0 - x_0\|^2 + 2\mathbb{E} \|w_0 - v_0\|^2 \\ & \leq 5 \frac{d}{m}. \end{aligned}$$

When  $N = \frac{2\kappa}{h} \log \left( \frac{20}{\epsilon^2} \right)$ ,

$$e^{-\frac{Nh}{2\kappa}} \mathbb{E} \left[ \|y_0 - x_0\|^2 + \|y_0 + w_0 - x_0 - v_0\|^2 \right] \leq \frac{\epsilon^2 d}{4m}.$$

By Lemma 2,

$$\begin{aligned} & \sum_{n=1}^N \frac{2\kappa}{h} \left( 2\mathbb{E} \|\mathbb{E}_\alpha v_n - v_n^*\|^2 + 3\mathbb{E} \|\mathbb{E}_\alpha x_n - x_n^*\|^2 \right) \\ & \leq O \left( h^7 \kappa \sum_{n=0}^{N-1} \mathbb{E} \|v_n\|^2 + \frac{u}{m} h^9 \sum_{n=0}^{N-1} \mathbb{E} \|\nabla f(x_n)\|^2 + \frac{1}{m} N d h^8 \right), \end{aligned}$$

and

$$\begin{aligned} & \sum_{n=1}^N \left( 2\mathbb{E} \|v_n - v_n^*\|^2 + 3\mathbb{E} \|x_n - x_n^*\|^2 \right) \\ & \leq O \left( h^4 \sum_{n=0}^{N-1} \mathbb{E} \|v_n\|^2 + u^2 h^4 \sum_{n=0}^{N-1} \mathbb{E} \|\nabla f(x_n)\|^2 + N u d h^5 \right). \end{aligned}$$

By Lemma 2 of [12],  $\mathbb{E} \|\nabla f(y_N)\|^2 \leq dL$ . Then, by  $\mathbb{E} \|\nabla f(y_N)\|^2 \leq dL$  and  $\mathbb{E} \|w_N\|^2 = \frac{d}{L}$ ,

$$|\mathbb{E} \nabla f(x_N)^T v_N| \leq \mathbb{E} \left[ L \|v_N\|^2 + u \|\nabla f(x_N)\|^2 \right]$$

$$\begin{aligned}
&\leq 2\mathbb{E} \left[ L \|w_N\|^2 + L \|v_N - w_N\|^2 + u \|\nabla f(y_N)\|^2 + L \|x_N - y_N\|^2 \right] \\
&\leq 4d + 2L\mathbb{E} \left[ \|v_N - w_N\|^2 + \|x_N - y_N\|^2 \right] \\
&\leq 4d + 6L\mathbb{E} \left[ \|x_N - y_N\|^2 + \|(x_N + v_N) - (y_N + w_N)\|^2 \right],
\end{aligned}$$

By Lemma 12 and our choice of  $N$ ,

$$\sum_{n=0}^{N-1} \|\nabla f(x_n(0))\|^2 \leq O \left( \frac{\kappa d L}{h} \log \left( \frac{1}{\epsilon^2} \right) + \frac{L^2}{h} \mathbb{E} \left[ \|x_N - y_N\|^2 + \|(x_N + v_N) - (y_N + w_N)\|^2 \right] \right),$$

and

$$\sum_{n=0}^{N-1} \mathbb{E} \|v_n(0)\|^2 \leq O \left( \frac{d}{hm} \log \left( \frac{1}{\epsilon^2} \right) + \mathbb{E} \left[ \|x_N - y_N\|^2 + \|(x_N + v_N) - (y_N + w_N)\|^2 \right] \right).$$

Thus,

$$\begin{aligned}
&\sum_{n=1}^N \frac{2\kappa}{h} \left( 2\mathbb{E} \|\mathbb{E}_\alpha v_n - v_n^*\|^2 + 3\mathbb{E} \|\mathbb{E}_\alpha x_n - x_n^*\|^2 \right) + \sum_{n=1}^N \left( 2\mathbb{E} \|v_n - v_n^*\|^2 + 3\mathbb{E} \|x_n - x_n^*\|^2 \right) \\
&\leq O \left( \left( \frac{\kappa d h^6}{m} + \frac{d h^3}{m} \right) \log \left( \frac{1}{\epsilon^2} \right) \right) \\
&\quad + O \left( \kappa h^7 + h^3 \right) \mathbb{E} \left[ \|x_N - y_N\|^2 + \|(x_N + v_N) - (y_N + w_N)\|^2 \right].
\end{aligned}$$

Then, we can choose a small constant  $C$  such that if we let

$$h = C \min \left( \frac{\epsilon^{1/3}}{\kappa^{1/6}} \log^{-1/6} \left( \frac{1}{\epsilon^2} \right), \epsilon^{2/3} \log^{-1/3} \left( \frac{1}{\epsilon^2} \right) \right),$$

then

$$\begin{aligned}
&\sum_{n=1}^N \frac{2\kappa}{h} \left( 2\mathbb{E} \|\mathbb{E}_\alpha v_n - v_n^*\|^2 + 3\mathbb{E} \|\mathbb{E}_\alpha x_n - x_n^*\|^2 \right) + \sum_{n=1}^N \left( 2\mathbb{E} \|v_n - v_n^*\|^2 + 3\mathbb{E} \|x_n - x_n^*\|^2 \right) \\
&\leq \frac{\epsilon^2 d}{4m} + \frac{1}{2} \mathbb{E} \left[ \|x_N - y_N\|^2 + \|(x_N + v_N) - (y_N + w_N)\|^2 \right].
\end{aligned}$$

Therefore,

$$\begin{aligned}
&\mathbb{E} \left[ \|x_N - y_N\|^2 + \|(x_N + v_N) - (y_N + w_N)\|^2 \right] \\
&\leq \frac{\epsilon^2 d}{4m} + \frac{\epsilon^2 d}{4m} + \frac{1}{2} \mathbb{E} \left[ \|x_N - y_N\|^2 + \|(x_N + v_N) - (y_N + w_N)\|^2 \right] \\
&= \frac{\epsilon^2 d}{2m} + \frac{1}{2} \mathbb{E} \left[ \|x_N - y_N\|^2 + \|(x_N + v_N) - (y_N + w_N)\|^2 \right],
\end{aligned}$$

which implies

$$\mathbb{E} \left[ \|x_N - y_N\|^2 \right] \leq \mathbb{E} \left[ \|x_N - y_N\|^2 + \|(x_N + v_N) - (y_N + w_N)\|^2 \right] \leq \frac{\epsilon^2 d}{m}.$$

By our choice of  $h$ ,

$$N \leq \tilde{O} \left( \frac{\kappa^{7/6}}{\epsilon^{1/3}} + \frac{\kappa}{\epsilon^{2/3}} \right).$$

□

## F Discretization Error of Algorithm 2

Here, we bound the discretization error in one step of Algorithm 2. Since the terms  $\mathbb{E} \|\mathbb{E}_\alpha x_{n+1} - x_n^*(h)\|^2$  and  $\mathbb{E} \|x_{n+1} - x_n^*(h)\|^2$  are dominated by the terms  $\mathbb{E} \|\mathbb{E}_\alpha v_{n+1} - v_n^*(h)\|^2$  and  $\mathbb{E} \|v_{n+1} - v_n^*(h)\|^2$ , we bound only the later two terms.

**Lemma 13.** *Assume that  $R^4 \delta^4 \leq \frac{1}{4}$ . Let  $x_n^{(k-1,i)}$  for  $i = 1, \dots, R$ ,  $k = 1, \dots, K$  be the intermediate value computed in iteration  $n$  of Algorithm 2. Let  $\{x_n^*(t), v_n^*(t)\}_{t \in [0, h]}$  be the ideal underdamped Langevin diffusion, starting from  $x_n^*(0) = x_n$  and  $v_n^*(0) = v_n$ , coupled through a shared Brownian motion with  $\left\{x_n^{(k-1,i)}\right\}_{i=1, \dots, R, k=1, \dots, K}$ . Then, for any  $i = 1, \dots, R$ , and  $k = 1, \dots, K - 1$ ,*

$$\begin{aligned} \mathbb{E} \left\| x_n^{(k,i)} - x_n^*(\alpha_i h) \right\|^2 &\leq (2R^4 \delta^4)^k \frac{1}{R} \sum_{j=1}^R \mathbb{E} \|x_n - x_n^*(\alpha_j h)\|^2 \\ &\quad + 4R^3 \delta^4 \sum_{j=1}^R \mathbb{E} \sup_{s \in [(j-1)\delta, j\delta]} \|x_n^*(\alpha_j h) - x_n^*(s)\|^2. \end{aligned}$$

*Proof.* For any  $i = 1, \dots, R$ , and  $k = 1, \dots, K - 1$ ,

$$\begin{aligned} &\mathbb{E} \left\| x_n^{(k,i)} - x_n^*(\alpha_i h) \right\|^2 \\ &\leq \mathbb{E} \left\| \frac{1}{2} u \sum_{j=1}^i \left[ \int_{(j-1)\delta}^{\min(j\delta, \alpha_i h)} (1 - e^{-2(\alpha_i h - s)}) \, ds \cdot \nabla f(x_n^{(k-1,j)}) \right] \right. \\ &\quad \left. - \frac{1}{2} u \int_0^{\alpha_i h} (1 - e^{-2(\alpha_i h - s)}) \nabla f(x_n^*(s)) \, ds \right\|^2 \\ &\leq \frac{1}{2} \mathbb{E} \left\| u \sum_{j=1}^i \left[ \int_{(j-1)\delta}^{\min(j\delta, \alpha_i h)} (1 - e^{-2(\alpha_i h - s)}) \, ds \cdot (\nabla f(x_n^{(k-1,j)}) - \nabla f(x_n^*(\alpha_j h))) \right] \right\|^2 \\ &\quad + \frac{1}{2} \mathbb{E} \left\| u \sum_{j=1}^i \left[ \int_{(j-1)\delta}^{\min(j\delta, \alpha_i h)} (1 - e^{-2(\alpha_i h - s)}) (\nabla f(x_n^*(\alpha_j h)) - \nabla f(x_n^*(s))) \, ds \right] \right\|^2, \end{aligned}$$

where the first step follows by the definition, and the second step follows by Young's inequality.

To compute the first term,

$$\begin{aligned} &\frac{1}{2} \mathbb{E} \left\| u \sum_{j=1}^i \left[ \int_{(j-1)\delta}^{\min(j\delta, \alpha_i h)} (1 - e^{-2(\alpha_i h - s)}) \, ds \cdot (\nabla f(x_n^{(k-1,j)}) - \nabla f(x_n^*(\alpha_j h))) \right] \right\|^2 \\ &\leq \frac{1}{2} u^2 R \sum_{j=1}^i \mathbb{E} \left\| \int_{(j-1)\delta}^{\min(j\delta, \alpha_i h)} (1 - e^{-2(\alpha_i h - s)}) \, ds \cdot (\nabla f(x_n^{(k-1,j)}) - \nabla f(x_n^*(\alpha_j h))) \right\|^2 \\ &\leq 2R^3 \delta^4 \sum_{j=1}^R \mathbb{E} \left\| x_n^{(k-1,j)} - x_n^*(\alpha_j h) \right\|^2, \end{aligned} \tag{17}$$

where the first step follows by the inequality  $(\sum_{i=1}^n a_i)^2 \leq n \sum_{i=1}^n a_i^2$ , the second step follows by  $1 - e^{-2(\alpha_i h - s)} \leq 2R\delta$  and  $\nabla f$  is  $L$ -Lipschitz.

For the second term,

$$\frac{1}{2} \mathbb{E} \left\| u \sum_{j=1}^i \left[ \int_{(j-1)\delta}^{\min(j\delta, \alpha_i h)} (1 - e^{-2(\alpha_i h - s)}) (\nabla f(x_n^*(\alpha_j h)) - \nabla f(x_n^*(s))) \, ds \right] \right\|^2$$

$$\begin{aligned}
&\leq \frac{1}{2} u^2 R \sum_{j=1}^i \mathbb{E} \left\| \int_{(j-1)\delta}^{\min(j\delta, \alpha_i h)} \left(1 - e^{-2(\alpha_i h - s)}\right) (\nabla f(x_n^*(\alpha_j h)) - \nabla f(x_n^*(s))) \, ds \right\|^2 \\
&\leq 2R^3 \delta^4 \sum_{j=1}^R \mathbb{E} \sup_{s \in [(j-1)\delta, j\delta]} \|x_n^*(\alpha_j h) - x_n^*(s)\|^2, \tag{18}
\end{aligned}$$

where the first step follows by the inequality  $(\sum_{i=1}^n a_i)^2 \leq n \sum_{i=1}^n a_i^2$  and the second step follows by  $1 - e^{-2(\alpha_i h - s)} \leq 2R\delta$  and  $\nabla f$  is  $L$ -Lipschitz. Thus,

$$\begin{aligned}
&\mathbb{E} \|x_n^{(k,i)} - x_n^*(\alpha_i h)\|^2 \\
&\leq 2R^3 \delta^4 \sum_{j=1}^R \mathbb{E} \|x_n^{(k-1,j)} - x_n^*(\alpha_j h)\|^2 + 2R^3 \delta^4 \sum_{j=1}^R \mathbb{E} \sup_{s \in [(j-1)\delta, j\delta]} \|x_n^*(\alpha_j h) - x_n^*(s)\|^2 \\
&\leq (2R^4 \delta^4)^k \frac{1}{R} \sum_{j=1}^R \mathbb{E} \|x_n - x_n^*(\alpha_j h)\|^2 \\
&\quad + \left(1 + 2R^4 \delta^4 + \dots + (2R^4 \delta^4)^{k-1}\right) 2R^3 \delta^4 \sum_{j=1}^R \mathbb{E} \sup_{s \in [(j-1)\delta, j\delta]} \|x_n^*(\alpha_j h) - x_n^*(s)\|^2 \\
&\leq (2R^4 \delta^4)^k \frac{1}{R} \sum_{j=1}^R \mathbb{E} \|x_n - x_n^*(\alpha_j h)\|^2 + 4R^3 \delta^4 \sum_{j=1}^R \mathbb{E} \sup_{s \in [(j-1)\delta, j\delta]} \|x_n^*(\alpha_j h) - x_n^*(s)\|^2,
\end{aligned}$$

where the first step follows by (17) and (18), the second step follows by induction, and the third step follows by  $2R^4 \delta^4 \leq \frac{1}{2}$ .  $\square$

**Lemma 14.** Let  $(v_n, x_n)$  be the iterates of iteration  $n$ . Let  $x_n^{(k,i)}$  for  $i = 1, \dots, R$ ,  $k = 1, \dots, K-1$  be the intermediate value computed in iteration  $n$  of Algorithm 2. Let  $\{x_n^*(t), v_n^*(t)\}_{t \in [0, h]}$  be the ideal underdamped Langevin diffusion, starting from  $x_n^*(0) = x_n$  and  $v_n^*(0) = v_n$ , coupled through a shared Brownian motion with  $\{x_n^{(k,i)}\}_{i=1, \dots, R, k=1, \dots, K-1}$ . Assume that  $h = R\delta \leq \frac{1}{10}$  and  $K \geq \Omega(\log \frac{1}{\delta^4})$ . Let  $\mathbb{E}_\alpha$  be the expectation taken over the choice of  $\alpha_1, \dots, \alpha_R$  in iteration  $n$ . Let  $\mathbb{E}$  be the expectation taken over other randomness in iteration  $n$ . Then,

$$\begin{aligned}
\mathbb{E} \|\mathbb{E}_\alpha v_{n+1} - v_n^*(h)\|^2 &\leq O\left(R^6 \delta^8 \|v_n\|^2 + u^2 R^6 \delta^{10} \|\nabla f(x_n)\|^2 + R^6 \delta^9 u d\right), \\
\mathbb{E} \|v_{n+1} - v_n^*(h)\|^2 &\leq O\left(R^2 \delta^4 \|v_n\|^2 + u^2 R^2 \delta^4 \|\nabla f(x_n)\|^2 + R^2 \delta^5 u d\right).
\end{aligned}$$

*Proof.* To show the first claim,

$$\begin{aligned}
&\mathbb{E} \|\mathbb{E}_\alpha v_{n+1} - v_n^*(h)\|^2 \\
&\leq \mathbb{E} \left\| \mathbb{E}_\alpha u \sum_{i=1}^R \delta e^{-2(h-\alpha_i h)} \nabla f(x_n^{(K-1,i)}) - u \int_0^h e^{-2(h-s)} \nabla f(x_n^*(s)) \, ds \right\|^2 \\
&\leq 2\mathbb{E} \left\| u \sum_{i=1}^R \delta e^{-2(h-\alpha_i h)} \nabla f(x_n^{(K-1,i)}) - u \sum_{i=1}^R \delta e^{-2(h-\alpha_i h)} \nabla f(x_n^*(\alpha_i h)) \right\|^2 \\
&\quad + 2\mathbb{E} \left\| \mathbb{E}_\alpha u \sum_{i=1}^R \delta e^{-2(h-\alpha_i h)} \nabla f(x_n^*(\alpha_i h)) - u \int_0^h e^{-2(h-s)} \nabla f(x_n^*(s)) \, ds \right\|^2 \\
&\leq 2\delta^2 R \sum_{i=1}^R \mathbb{E} \|x_n^{(K-1,i)} - x_n^*(\alpha_i h)\|^2 + 0 \\
&\leq 2\delta^2 R (2R^4 \delta^4)^{K-1} \sum_{i=1}^R \mathbb{E} \|x_n - x_n^*(\alpha_i h)\|^2
\end{aligned}$$



$$+8R^5\delta^6 \sum_{i=1}^R \mathbb{E} \sup_{s \in [(i-1)\delta, i\delta]} \|x_n^*(\alpha_i h) - x_n^*(s)\|^2, \quad (19)$$

where the first step follows by the definition, the second step follows by Young's inequality, and the third step follows by

$$\mathbb{E}_\alpha \delta e^{-2(h-\alpha_i h)} \nabla f(x_n^*(\alpha_i h)) = \int_{(i-1)\delta}^{i\delta} e^{-2(h-s)} \nabla f(x_n^*(s)) \, ds.$$

To show the second claim,

$$\begin{aligned} & \mathbb{E} \|v_{n+1} - v_n^*(h)\|^2 \\ & \leq \mathbb{E} \left\| u \sum_{i=1}^R \delta e^{-2(h-\alpha_i h)} \nabla f(x_n^{(K-1,i)}) - u \int_0^h e^{-2(h-s)} \nabla f(x_n^*(s)) \, ds \right\|^2 \\ & \leq 3\mathbb{E} \left\| u \sum_{i=1}^R \delta e^{-2(h-\alpha_i h)} \nabla f(x_n^{(K-1,i)}) - u \sum_{i=1}^R \delta e^{-2(h-\alpha_i h)} \nabla f(x_n^*(\alpha_i h)) \right\|^2 \\ & \quad + 3\mathbb{E} \left\| u \sum_{i=1}^R \int_{(i-1)\delta}^{i\delta} e^{-2(h-\alpha_i h)} (\nabla f(x_n^*(\alpha_i h)) - \nabla f(x_n^*(s))) \, ds \right\|^2 \\ & \quad + 3\mathbb{E} \left\| u \sum_{i=1}^R \int_{(i-1)\delta}^{i\delta} (e^{-2(h-\alpha_i h)} - e^{-2(h-s)}) \nabla f(x_n^*(s)) \, ds \right\|^2. \end{aligned}$$

Like the proof of the third claim, the first term satisfies

$$\begin{aligned} & 3\mathbb{E} \left\| u \sum_{i=1}^R \delta e^{-2(h-\alpha_i h)} \nabla f(x_n^{(K-1,i)}) - u \sum_{i=1}^R \delta e^{-2(h-\alpha_i h)} \nabla f(x_n^*(\alpha_i h)) \right\|^2 \\ & \leq 3\delta^2 R (2R^4 \delta^4)^{K-1} \sum_{i=1}^R \mathbb{E} \|x_n - x_n^*(\alpha_i h)\|^2 + 12R^5 \delta^6 \sum_{i=1}^R \mathbb{E} \sup_{s \in [(i-1)\delta, i\delta]} \|x_n^*(\alpha_i h) - x_n^*(s)\|^2. \end{aligned}$$

The second term satisfies

$$\begin{aligned} & 3\mathbb{E} \left\| u \sum_{i=1}^R \int_{(i-1)\delta}^{i\delta} e^{-2(h-\alpha_i h)} (\nabla f(x_n^*(\alpha_i h)) - \nabla f(x_n^*(s))) \, ds \right\|^2 \\ & \leq 3u^2 R \sum_{i=1}^R \mathbb{E} \left\| \int_{(i-1)\delta}^{i\delta} e^{-2(h-\alpha_i h)} (\nabla f(x_n^*(\alpha_i h)) - \nabla f(x_n^*(s))) \, ds \right\|^2 \\ & \leq 3\delta^2 R \sum_{i=1}^R \mathbb{E} \sup_{s \in [(i-1)\delta, i\delta]} \|x_n^*(\alpha_i h) - x_n^*(s)\|^2, \end{aligned}$$

where the first step follows by  $(\sum_{i=1}^n a_i)^2 \leq n \sum_{i=1}^n a_i^2$ , and the second step follows by  $\nabla f$  is  $L$ -Lipschitz.

The last term satisfies

$$3\mathbb{E} \left\| u \sum_{i=1}^R \int_{(i-1)\delta}^{i\delta} (e^{-2(h-\alpha_i h)} - e^{-2(h-s)}) \nabla f(x_n^*(s)) \, ds \right\|^2 \leq 12u^2 R^2 \delta^4 \mathbb{E} \sup_{s \in [0, h]} \|\nabla f(x_n^*(s))\|^2,$$

which follows by  $e^{-2(h-\alpha_i h)} - e^{-2(h-s)} \leq 2\delta$  for  $s \in [(i-1)\delta, i\delta]$ . Thus,

$$\begin{aligned} & \mathbb{E} \|v_{n+1} - v_n^*(h)\|^2 \\ & \leq 3\delta^2 R (2R^4 \delta^4)^{K-1} \sum_{i=1}^R \mathbb{E} \|x_n - x_n^*(\alpha_i h)\|^2 \end{aligned}$$

$$\begin{aligned}
& +12R^5\delta^6 \sum_{i=1}^R \mathbb{E} \sup_{s \in [(i-1)\delta, i\delta]} \|x_n^*(\alpha_i h) - x_n^*(s)\|^2 \\
& +3\delta^2 R \sum_{i=1}^R \mathbb{E} \sup_{s \in [(i-1)\delta, i\delta]} \|x_n^*(\alpha_i h) - x_n^*(s)\|^2 + 12u^2 R^2 \delta^4 \mathbb{E} \sup_{s \in [0, h]} \|\nabla f(x_n^*(s))\|^2 \quad (20)
\end{aligned}$$

By Lemma 6, for  $i = 1, \dots, R$ ,

$$\mathbb{E} \|x_n - x_n^*(\alpha_i h)\|^2 \leq O\left(R^2 \delta^2 \|v_n\|^2 + u^2 R^4 \delta^4 \|\nabla f(x_n)\|^2 + udR^3 \delta^3\right),$$

,and

$$\mathbb{E} \sup_{s \in [(i-1)\delta, i\delta]} \|x_n^*(\alpha_i h) - x_n^*(s)\|^2 \leq O\left(\delta^2 \|v_n\|^2 + u^2 \delta^4 \|\nabla f(x_n)\|^2 + ud\delta^3\right).$$

Thus, when  $K \geq \Omega(\log \frac{1}{\delta^4})$ , since  $R\delta \leq \frac{1}{10}$ ,  $(2R^4 \delta^4)^{K-1} \leq O(\delta^4)$ . By (19) and (20),

$$\mathbb{E} \|\mathbb{E}_\alpha v_{n+1} - v_n^*(h)\|^2 \leq O\left(R^6 \delta^8 \|v_n\|^2 + u^2 R^6 \delta^{10} \|\nabla f(x_n)\|^2 + R^6 \delta^9 ud\right),$$

and

$$\mathbb{E} \|v_{n+1} - v_n^*(h)\|^2 \leq O\left(R^2 \delta^4 \|v_n\|^2 + u^2 R^2 \delta^4 \mathbb{E} \|\nabla f(x_n)\|^2 + R^2 \delta^5 ud\right).$$

□
